# Supplementary material for: Corporate Cash Hoarding: The Role of Just-in-Time Adoption
Source: Atypon-hosted journal article supplement (doi:10.1287/mnsc.2017.2775), 2017-06-27
Supplement: mnsc.2017.2775-sm-data.zip [file readme.pdf › readme.pdf]

This file contains information for replicating results in the paper  
“Corporate Cash Hoarding: The Role of Just-in-Time Adoption”  
by Xiaodan Gao, forthcoming in Management Science, 2017.

The following files are included:

`code_conditionalcorr.do` – stata code file, which contains stata code for replicating Tables 1 and 2 in the paper.

`code_JITadopter.do` – stata code file, which contains stata code for replicating Figure 3 and Table 3 in the paper.

`code_JITadopter_regression.do` – stata code file, which contains stata code for replicating Table 4 in the paper.

`markupdata12.dat` – data file, which contains the dataset used to replicate Tables 1 and 2 in the paper.

`JITannualcohort.dat` – data file, which contains the dataset used to replicate Tables 1 and 2 in the paper.

`rawdatausq.dat` – data file, which contains the dataset used to replicate Figure 3 and Tables 3-4 in the paper.
